# Supplementary material
Source: HighWire-hosted journal article supplement (https://www.rcpjournals.org/highwire/filestream/13960/field_highwire_adjunct_files/0/Brown_supplementary_material_S1.pdf)
Supplement: Brown_supplementary_material_S1.pdf [file Brown_supplementary_material_S1.pdf]

Study ID:  
M/F:  
Age:

**Questionnaire for Clinical Assistants**

*For questions with multiple options, please select the option most applicable to yourself unless it specifies you may select multiple options. IMG = International Medical Graduate.*

**Likert scale to be used for Q12a, 13, 15, 16**

|                          |                        |                        |                      |                    |                         |
|--------------------------|------------------------|------------------------|----------------------|--------------------|-------------------------|
| 1 (Not confident at all) | 2 (Slightly confident) | 3 (Somewhat confident) | 4 (Fairly confident) | 5 (Very confident) | N/A (Never been taught) |
|--------------------------|------------------------|------------------------|----------------------|--------------------|-------------------------|

|                                                                                                                                           |                 |                                                                  |                 |                                           |                                              |              |                        |  |
|-------------------------------------------------------------------------------------------------------------------------------------------|-----------------|------------------------------------------------------------------|-----------------|-------------------------------------------|----------------------------------------------|--------------|------------------------|--|
| <b>Q1a</b> Medical School                                                                                                                 |                 |                                                                  |                 |                                           |                                              |              | <b>Q1b</b> Tick if GEM |  |
| <b>Q2a</b> Year of Study (in March 2020)                                                                                                  | 1 <sup>st</sup> |                                                                  | 3 <sup>rd</sup> |                                           | 5 <sup>th</sup> (Pre-finals)                 |              | Intercalating          |  |
|                                                                                                                                           | 2 <sup>nd</sup> |                                                                  | 4 <sup>th</sup> |                                           | 5 <sup>th</sup> (Post-finals)                |              | N/A (IMG)              |  |
| <b>Q2b</b> If IMG, please state years of working as a doctor prior to NGH                                                                 |                 |                                                                  |                 |                                           |                                              |              |                        |  |
| <b>Q3</b> Prev. clinical exp.                                                                                                             | 0 months        | <3 months                                                        | 3-6 months      | 6-12 months                               | 12-18 months                                 | 18-24 months | 24+ months             |  |
| <b>Q4</b> Start date at NGH                                                                                                               |                 | <b>Q5</b> No. of shifts worked so far ( <b>check Patchwork</b> ) |                 |                                           |                                              |              |                        |  |
| <b>Q6</b> Average No. of hours worked per week ( <b>check Patchwork</b> )                                                                 |                 |                                                                  |                 |                                           |                                              |              |                        |  |
| <b>Q7</b> Wards / specialties where you have worked majority of your shifts ( <b>5 or more shifts</b> ) – <b>can select more than one</b> |                 |                                                                  |                 |                                           |                                              |              |                        |  |
| Willow                                                                                                                                    | Cedar           | Rowan                                                            | Hawthorn        | Collingtree                               | Surgery                                      | Holcot       | Brampton               |  |
| Walter                                                                                                                                    | Creaton         | Talbot                                                           | Dryden          | Spencer                                   | Knightley                                    | Urgent Care  | Esther White           |  |
| Tull                                                                                                                                      |                 | Butler                                                           |                 |                                           |                                              | H&N          | Finedon                |  |
| Abington                                                                                                                                  | Eleanor         | Althorp                                                          | Allebone        | Benham                                    | Beckett                                      |              |                        |  |
| Other (please specify)                                                                                                                    |                 |                                                                  |                 |                                           |                                              |              |                        |  |
| <b>Q8</b> No. of night shifts worked:                                                                                                     |                 |                                                                  |                 | <b>Q9</b> Ward/specialty for night shift: |                                              |              |                        |  |
| <b>Q10</b> Did you have login-in details for the IT systems on your first shift? Yes / No                                                 | Trust login     | ICE                                                              | VitalPa c       | PCS EDN                                   | EMRAD (scans)                                | Trust email  |                        |  |
| <b>Q11</b> If no access to any of the above, did you get access eventually? ( <b>Specify the system</b> )                                 | Within 1 week   | Within 2 weeks                                                   | Within 1 month  | Within 2 months                           | Still no access ( <b>any reason given?</b> ) |              |                        |  |

**Q12a** How confident did you feel doing the procedure **before** you started working at NGH? *Please score yourself for each procedure below using the Likert scale at the top of Page 1.*

|         |                |      |      |          |           |
|---------|----------------|------|------|----------|-----------|
| Blood s | Blood Cultures | ABGs | VBGs | Cannulas | Catheters |
|---------|----------------|------|------|----------|-----------|

**Q12b** If you had never been taught any of the above procedures before, did you have any difficulty getting permission from your medical school?

|                                            |                                                                               |                                 |
|--------------------------------------------|-------------------------------------------------------------------------------|---------------------------------|
| No – I received permission before starting | Yes – I received permission after starting ( <b>how long was the delay?</b> ) | Yes – I wasn't given permission |
|--------------------------------------------|-------------------------------------------------------------------------------|---------------------------------|

**Q13** How confident do you now feel doing the procedure **after** working at NGH? *Please score yourself for each procedure below with the Likert scale at the top of Page 1. **If you have been taught but not had a chance to do the procedure yet, please put an X in the box instead.***

|         |                |      |      |          |           |
|---------|----------------|------|------|----------|-----------|
| Blood s | Blood Cultures | ABGs | VBGs | Cannulas | Catheters |
|---------|----------------|------|------|----------|-----------|

**Q14** Are there any other **practical skills** you have been able to gain experience of during your time at NGH? *Please list them below – e.g. inserting NG tubes, skin suturing.*

**Q15** How confident did you feel completing the following tasks expected of a junior doctor **before** working at NGH? *Please score yourself for each task with the Likert scale on Page 1.*

|                                  |  |                                         |  |                                  |  |                                     |  |
|----------------------------------|--|-----------------------------------------|--|----------------------------------|--|-------------------------------------|--|
| Prepping notes for WR            |  | Documenting on the WR                   |  | Requesting scans on ICE          |  | Vetting scans with radiology        |  |
| Writing EDNs (discharge letters) |  | Initial assessment of an unwell patient |  | Clerking a patient: Hx & examine |  | Clerking a pt: Dx & initial Mx plan |  |

**Q16** How confident do you feel completing the following tasks expected of a junior doctor **after** working at NGH? *Please score yourself for each task with the Likert scale on Page 1.*

|                                  |  |                                         |  |                                  |  |                                     |  |
|----------------------------------|--|-----------------------------------------|--|----------------------------------|--|-------------------------------------|--|
| Prepping notes for WR            |  | Documenting on the WR                   |  | Requesting scans on ICE          |  | Vetting scans with radiology        |  |
| Writing EDNs (discharge letters) |  | Initial assessment of an unwell patient |  | Clerking a patient: Hx & examine |  | Clerking a pt: Dx & initial Mx plan |  |

**Q17** Are there any other tasks you now feel more confident of doing **after** working at NGH? *E.g. seeking advice from another specialty for a patient, family discussions. **If you feel more confident prescribing, please also put this down here.***

**Q18** For CAs who received HCA training, did you complete any of the tasks when working?

|               |  |               |  |                                                          |  |
|---------------|--|---------------|--|----------------------------------------------------------|--|
| Takings obs   |  | Personal care |  | Filling in documentation e.g. cannula care, fluid charts |  |
| Changing beds |  | Mouth care    |  |                                                          |  |

**Q19** For CAs who received HCA training, are you still completing any of the tasks now?

|                              |  |    |  |
|------------------------------|--|----|--|
| Yes ( <b>which one(s)?</b> ) |  | No |  |
|------------------------------|--|----|--|

**Q20** If you answered **no** to **Q19**, what is the reason why you are not doing them now?

**Q21** Did you feel supported by the clinical team whilst working at NGH?

|       |  |        |  |               |  |       |  |             |  |
|-------|--|--------|--|---------------|--|-------|--|-------------|--|
| Never |  | Rarely |  | Sometime<br>s |  | Often |  | Always<br>s |  |
|-------|--|--------|--|---------------|--|-------|--|-------------|--|

**Q22** If you had any concerns or issues whilst working, who would you seek support from **first**?  
*E.g. witnessing or experiencing unprofessional behaviour, struggling with aspects of the job.*

|                        |  |                     |  |                                    |  |
|------------------------|--|---------------------|--|------------------------------------|--|
| Don't know             |  | Mr Tristan McMullan |  | A consultant you've worked with    |  |
| Rosie Warren           |  |                     |  | A junior doctor you've worked with |  |
| Other (please specify) |  |                     |  |                                    |  |

**Q23** Have you ever witnessed a distressing event whilst working at NGH? *E.g. an unsuccessful cardiac arrest.*

|                 |  |    |  |
|-----------------|--|----|--|
| Yes (how many?) |  | No |  |
|-----------------|--|----|--|

|     |  |    |  |
|-----|--|----|--|
| Yes |  | No |  |
|-----|--|----|--|

**Q24** If you answered yes to Q23, did you receive a debrief afterwards?

|     |  |    |  |
|-----|--|----|--|
| Yes |  | No |  |
|-----|--|----|--|

**Q25** Do you know how to contact the SOS team?

**Q26** Before working at NGH, I felt included as part of the clinical team on my previous clinical placements / clinical contact. *If no previous experience, put N/A.*

|       |  |        |  |           |  |       |  |        |  |     |  |
|-------|--|--------|--|-----------|--|-------|--|--------|--|-----|--|
| Never |  | Rarely |  | Sometimes |  | Often |  | Always |  | N/A |  |
|-------|--|--------|--|-----------|--|-------|--|--------|--|-----|--|

**Q27** Whilst working at NGH, I felt included as part of the clinical team.

|       |  |        |  |           |  |       |  |        |  |
|-------|--|--------|--|-----------|--|-------|--|--------|--|
| Never |  | Rarely |  | Sometimes |  | Often |  | Always |  |
|-------|--|--------|--|-----------|--|-------|--|--------|--|

**Q28** Whilst working at NGH, I felt I provided continuity of care towards patients by working in one ward / specialty on a regular basis.

|       |  |        |  |           |  |       |  |        |  |
|-------|--|--------|--|-----------|--|-------|--|--------|--|
| Never |  | Rarely |  | Sometimes |  | Often |  | Always |  |
|-------|--|--------|--|-----------|--|-------|--|--------|--|

**Q29** Where you able to attend the formal teaching organised for you when you were working?

|       |  |        |  |           |  |       |  |        |  |
|-------|--|--------|--|-----------|--|-------|--|--------|--|
| Never |  | Rarely |  | Sometimes |  | Often |  | Always |  |
|-------|--|--------|--|-----------|--|-------|--|--------|--|

**Q30** I found the formal teaching useful to my work as a Clinical Assistant.

|       |  |        |  |           |  |       |  |        |  |
|-------|--|--------|--|-----------|--|-------|--|--------|--|
| Never |  | Rarely |  | Sometimes |  | Often |  | Always |  |
|-------|--|--------|--|-----------|--|-------|--|--------|--|

**Q31** Were you unable to work a booked shift(s) for any reason?

|                                                                 |  |
|-----------------------------------------------------------------|--|
| Self-isolation with COVID19 symptoms + a positive swab result   |  |
| Self-isolation with COVID19 symptoms + a negative swab result   |  |
| Self-isolation with COVID19 symptoms + inconclusive swab result |  |
| Self-isolation with COVID19 symptoms + not able to get swabbed  |  |
| Self-isolation due to household member with COVID19 symptoms    |  |
| Unwell due to non-COVID related illness                         |  |
| Other (e.g. family emergency) – please specify if able to.      |  |

**Q32** Were you able to get FIT-tested when you started working?

|               |  |                |  |          |  |                     |  |
|---------------|--|----------------|--|----------|--|---------------------|--|
| Within 1 week |  | Within 2 weeks |  | >2 weeks |  | Not yet been tested |  |
|---------------|--|----------------|--|----------|--|---------------------|--|

**Q33** I have looked after patients where there have been aerosol generating procedures present.

|     |  |   |  |
|-----|--|---|--|
| Yes |  | N |  |
|     |  | o |  |

**Q34** Whilst working at NGH, I have had the following commitments to my medical school (can select multiple options). If none – please skip this question.

|                                                                   |  |
|-------------------------------------------------------------------|--|
| Exams / Assessments (taking place whilst you were working at NGH) |  |
| Revision for upcoming exams / assessments                         |  |
| Scheduled online lectures / seminars / small group teaching       |  |
| Coursework with deadlines e.g. essays, online e-learning modules  |  |
| Other (please specify)                                            |  |

**Q35** If you have had medical school commitments, how did you find balancing this with your job as a clinical assistant?

**Q36** If you have stopped working as a Clinical Assistant, what was the reason?

**Q37** I have enjoyed my time working at NGH.

|                   |  |          |  |         |  |       |  |                |  |
|-------------------|--|----------|--|---------|--|-------|--|----------------|--|
| Strongly disagree |  | Disagree |  | Neutral |  | Agree |  | Strongly agree |  |
|-------------------|--|----------|--|---------|--|-------|--|----------------|--|

**Q38** I believe that my experience at NGH has been a useful learning opportunity for the rest of my medical student career. **(IMGs to please skip this question).**

|                   |  |          |  |         |  |       |  |                |  |
|-------------------|--|----------|--|---------|--|-------|--|----------------|--|
| Strongly disagree |  | Disagree |  | Neutral |  | Agree |  | Strongly agree |  |
|-------------------|--|----------|--|---------|--|-------|--|----------------|--|

**Q39** I believe that my experience at NGH will help me to catch up what I have missed when I return to medical school. **(IMGs to please skip this question).**

|                   |  |          |  |         |  |       |  |                |  |
|-------------------|--|----------|--|---------|--|-------|--|----------------|--|
| Strongly disagree |  | Disagree |  | Neutral |  | Agree |  | Strongly agree |  |
|-------------------|--|----------|--|---------|--|-------|--|----------------|--|

**Q40** I believe that clinical assistantships should be incorporated into the medical school curriculum earlier than in the final year. **(IMGs to please skip this question).**

|                   |  |          |  |         |  |       |  |                |  |
|-------------------|--|----------|--|---------|--|-------|--|----------------|--|
| Strongly disagree |  | Disagree |  | Neutral |  | Agree |  | Strongly agree |  |
|-------------------|--|----------|--|---------|--|-------|--|----------------|--|

**Q41** I believe that my experience at NGH will help me to get a job (as a doctor) in the NHS in the future, including helping me to pass PLAB (if this is applicable to you). **For IMGs only.**

|                   |  |          |  |         |  |       |  |                |  |
|-------------------|--|----------|--|---------|--|-------|--|----------------|--|
| Strongly disagree |  | Disagree |  | Neutral |  | Agree |  | Strongly agree |  |
|-------------------|--|----------|--|---------|--|-------|--|----------------|--|

**Q42** How did you hear about the Clinical Assistant role at NGH?

|                        |  |                 |  |               |  |                |  |
|------------------------|--|-----------------|--|---------------|--|----------------|--|
| Social Media           |  | Internet search |  | Word of mouth |  | Medical school |  |
| Other (please specify) |  |                 |  |               |  |                |  |

**Q43** Is there any feedback you would like to share that hasn't been covered?
